# Supplementary material
Source: Springer Nature journal article supplement (https://www.springermedizin.de/resource/supplementary/12933_2009_181_MOESM1_ESM.pdf/9539770)

Plasma ADMA ( $\mu\text{mol/l}$ )

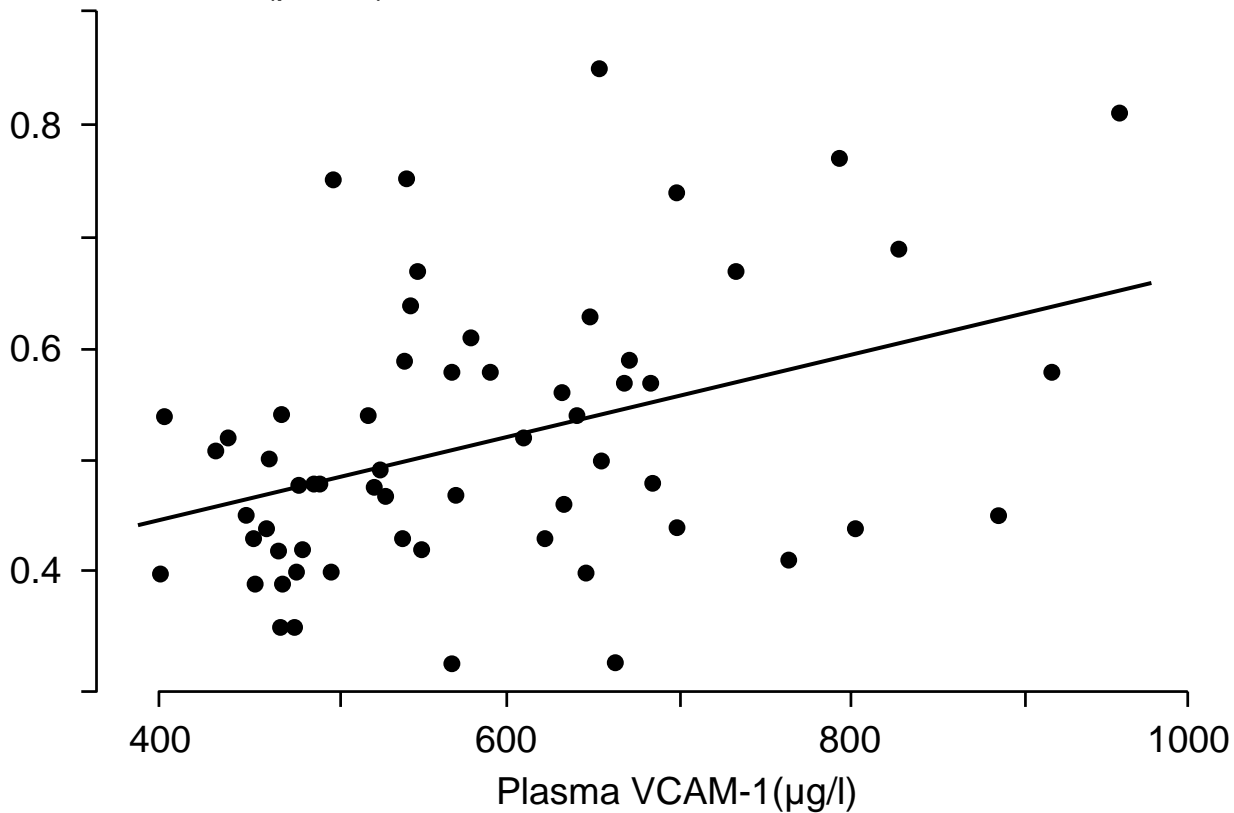

Plasma VCAM-1 ( $\mu\text{g/l}$ )

Supplement: MOESM1 [file 9539770]
